# Supplementary material for: Unipolar 1-phenylimidazo[1,5-a]pyridine: a new class of ultra-bright sky-blue emitters for solution-processed organic light emitting diodes
Source: Royal Society of Chemistry journal article supplement (doi:10.1039/d2nj01938h), 2022-01-01
Supplement: d2nj01938h1.pdf [file d2nj01938h1.pdf]

**Unipolar 1-phenylimidazo[1,5-a]pyridine: A new class of ultra-bright sky blue emitters  
for solution-processed organic light emitting diodes**

Jaipal Devesing Girase<sup>a</sup>, Aravind Babu Kajjam<sup>a</sup>, Deepak Kumar Dubey<sup>b</sup>, Kiran Kesavan<sup>b</sup>,  
Jwo-Huei Jou<sup>b</sup> and Sivakumar Vaidyanathan<sup>a\*</sup>,

<sup>a</sup> Department of Chemistry, National Institute of Technology Rourkela, India.

<sup>b</sup> Department of Materials Science and Engineering, National Tsing Hua University, Hsinchu,  
Taiwan-30013.

**Content.**

**SI1. Experimental section.**

**SI1.1 General information and measurements**

**SI1.2 Computational details**

**SI1.2 Device fabrication and measurements**

**SI2. NMR (<sup>1</sup>H and <sup>13</sup>C) spectra of ImPy-derivatives.**

**Fig. S1.** <sup>1</sup>H NMR spectra of ImPy-1.

**Fig. S2.** <sup>13</sup>C NMR spectra of ImPy-1.

**Fig. S3.** <sup>1</sup>H NMR spectra of ImPy-2.

**Fig. S4.** <sup>13</sup>C NMR spectra of ImPy-2.

**Fig. S5.** <sup>1</sup>H NMR spectra of ImPy-3.

**Fig. S6.** <sup>13</sup>C NMR spectra of ImPy-3.

**SI3. Mass spectra of the molecules.**

**Fig. S7.** Mass spectra of ImPy-1.

**Fig. S8.** Mass spectra of ImPy-2.

**Fig. S9.** Mass spectra of ImPy-3.

**SI4. Single crystal analysis of ImPy-1 and ImPy-3.**

**Table ST1.** Bond Lengths for ImPy-1.

**Table ST2.** Bond angles for ImPy-1.

**Table ST3.** Bond Lengths for ImPy-3.

**Table ST4.** Bond angles for ImPy-3.

## **SI5. Photophysical properties of ImPy derivatives**

**Fig. S7.** Normalized PL excitation spectra of the ImPy derivatives in solid states.

**Fig. S8.** Normalized PL excitation spectra of the ImPy derivatives in different solvents.

**Table ST5.** Molar extinction coefficient ( $\epsilon$ ) data for ImPy-1, ImPy-2 and ImPy-3.

**Table ST6.** The CIE color coordinates of ImPy derivatives in solution and solid.

**Table ST7.** Fluorescence life time data of ImPy derivatives.

## **SI6. The calculated UV-vis absorption spectra and vertical excitation wavelengths, orbital contribution and oscillator strength ( $f$ ) of ImPy derivatives.**

**Fig. S8.** Normalized PL excitation spectra of the ImPy derivatives in different solvents.

**Fig. S9.** Simulated UV-vis absorption spectra of the fluorophores Gas and in DCM phase.

**Table ST8.** The computed vertical transition and their oscillator strengths ( $f$ ) and configuration of the ImPy derivatives

**SI7.** Atoms coordinates of ImPy-1, ImPy-2 and ImPy-3.

## **SI1. Experimental section.**

### **SI1.1 General information and measurements**

NMR spectra ( $^1\text{H}$ , and  $^{13}\text{C}$ ) were recorded on an AV 400 Avance-III 400 MHz FT-NMR Spectrometer (Bruker Biospin International, Switzerland) with tetramethylsilane (TMS) as standard reference and Mass spectra of all the synthesized fluorophores were recorded on

High Resolution Mass Spectrometer (HRMS) Waters, USA, XEVO G2-XS QTOF model. The FT-IR spectra were recorded on a Perkin–Elmer RX-I FTIR spectrophotometer. Thermogravimetric analysis (TGA) was performed using TA Instrument TGAQ50 thermal analysis system. UV-Vis absorption was measured using UV-vis spectrophotometer (Shimadzu Corporation, japan/UV-2450 pekin Elmer, USA/Lamda 25) and photoluminescence (PL) spectra were recorded using an Edinburgh instrument FLS980 spectrofluorometer. The absolute PL Quantum yields (PLQY) were measured using an Edinburgh instrument spectrofluorometer, integrating sphere SC-30 model. The quantum yield of the fluorophores is calculated by using equation (1).

$$\Phi = \frac{L_0(\lambda) - L_i(\lambda)}{L_0(\lambda)}$$

(1)

$$\eta = \frac{E_i(\lambda) - (1 - \Phi)E_0(\lambda)}{E_0(\lambda)\Phi}$$

Where,  $L_0(\lambda)$  is the integrated excitation profile (sample is directly excited by the incident beam) and  $L_i(\lambda)$  are the integrated excitation profile attained from the empty integrated sphere.  $E_0(\lambda)$  is the integrated luminescence of solid caused by direct excitation and  $E_i(\lambda)$  is indirect illumination from the sphere, respectively. Photoluminescence lifetime of the dyes was measured at 298 K with an Edinburgh Instrument FLS 980 luminescence spectrometer based on the time correlated single photon counting technology for all the dyes. Cyclic voltammetry (CV) of the fluorophores were carried out by using AUTOLAB 302 Modular Potentiostat electrochemical analyzer at  $298 \pm 1$  K. The tests were carried out in dimethylformamide (DMF) containing 0.1 M tetrabutylammonium perchlorate ( $\text{Bu}_4\text{NClO}_4$ ) as a supporting electrolyte, and the scan rate were maintained at  $100 \text{ mVs}^{-1}$  with three conventional electrode configurations viz, a glassy carbon working electrode, a platinum

plate auxiliary electrode, and an Ag/AgCl reference electrode. The single crystal analysis was carried out by using Rigaku oxford diffraction (XtaLAB Pro II AFC12 (RINC):  $K\alpha$  single diffractometer) using Mo  $k\alpha$  as radiation source.

### **SI1.2 Computational details**

The optimized geometries and relevant energies of the ImPy derivatives were obtained by means of density functional theory (DFT) calculations using the hybrid B3LYP functional and 6-311G (d, p) basis set. At the same time, the absorption spectrum of ImPy derivatives were carried out by time-dependent density functional theory (TD-DFT) with B3LYP functional and the basis set 6-311G (d, p) based on the optimized S0 state geometry in the gas phase. All geometries were confirmed to be minima by additional vibrational frequency calculations. The singlet and lowest triplet energies were evaluated via the  $\Delta$  self-consistent field ( $\Delta$ SCF) method based on optimized geometries. All the DFT and TD-DFT calculations were conducted using the Gaussian 09 software package and Gauss View suite of programs for the studied system.<sup>1</sup>

### **SI1.3 Device fabrication and measurements**

ImPy based solution-processed sky-blue OLED were fabricated on a precleaned 150 nm patterned ITO substrate, cleaning process involve washing with detergent, sonication in acetone and isopropyl alcohol for 60 minutes then exposed under UV light for 15 minutes. A 30 nm layer of 3,4-ethylenedioxythiophene-poly(styrenesulfonate) (PEDOT: PSS) was spin-coated at 4500 rpm for 20 s then heat-treated at 140 °C for 20 min as hole injection layer. Further, CBP (4,4'-bis(N-carbazolyl)-1,1'-biphenyl) as a host and X wt % of ImPy based material were used as blue emitter dissolved in (THF) and an emissive layer of 20 nm was spin-coated at 2500 rpm for 20 s. All the spin coating was performed in a glovebox under in the nitrogen atmosphere. A 30 nm of an electron transporting layer TPBi (2,2',2''-(1,3,5-benzinetriyl)-tris(1-phenyl-1-H-benzimidazole)), 1 nm of LiF (lithium fluoride) as an electron

injection layer, an anode of 150 nm aluminium were deposited by thermal evaporation under high vacuum ( $6 \times 10^{-6}$  Torr).

## SI2. NMR ( $^1\text{H}$ and $^{13}\text{C}$ ) spectra of ImPy-derivatives.

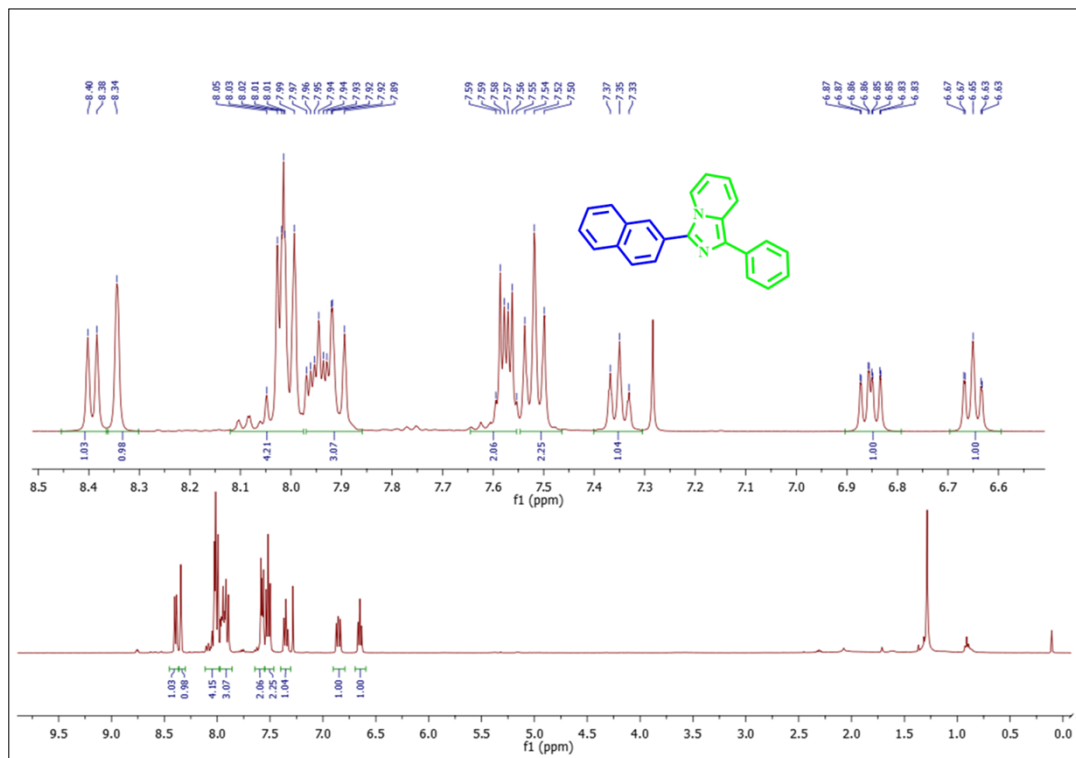

Fig. S1.  $^1\text{H}$  NMR spectra of ImPy-1.

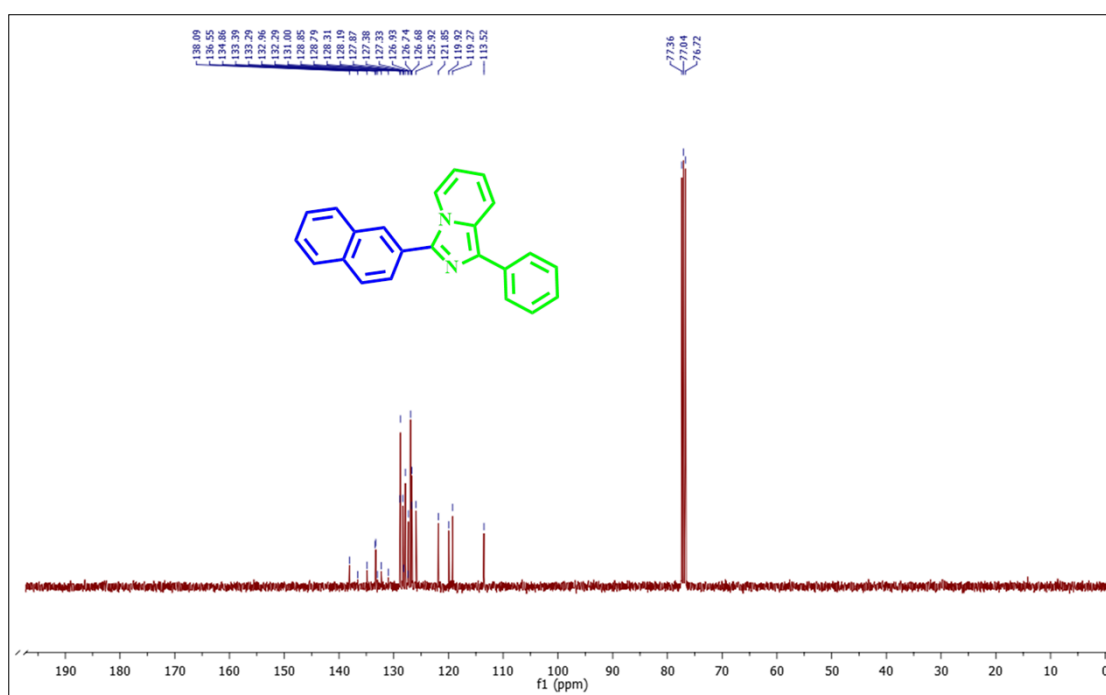

Fig. S2.  $^{13}\text{C}$  NMR spectra of ImPy-1.

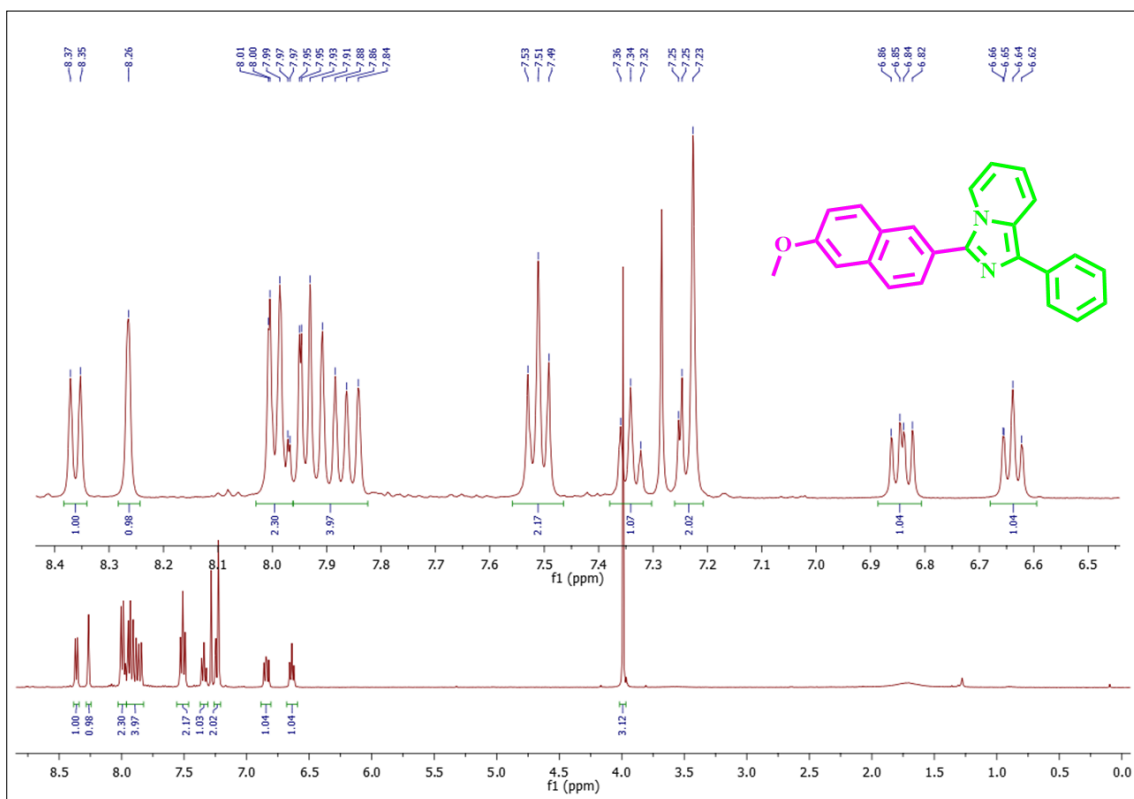

**Fig. S3.** <sup>1</sup>H NMR spectra of ImPy-2.

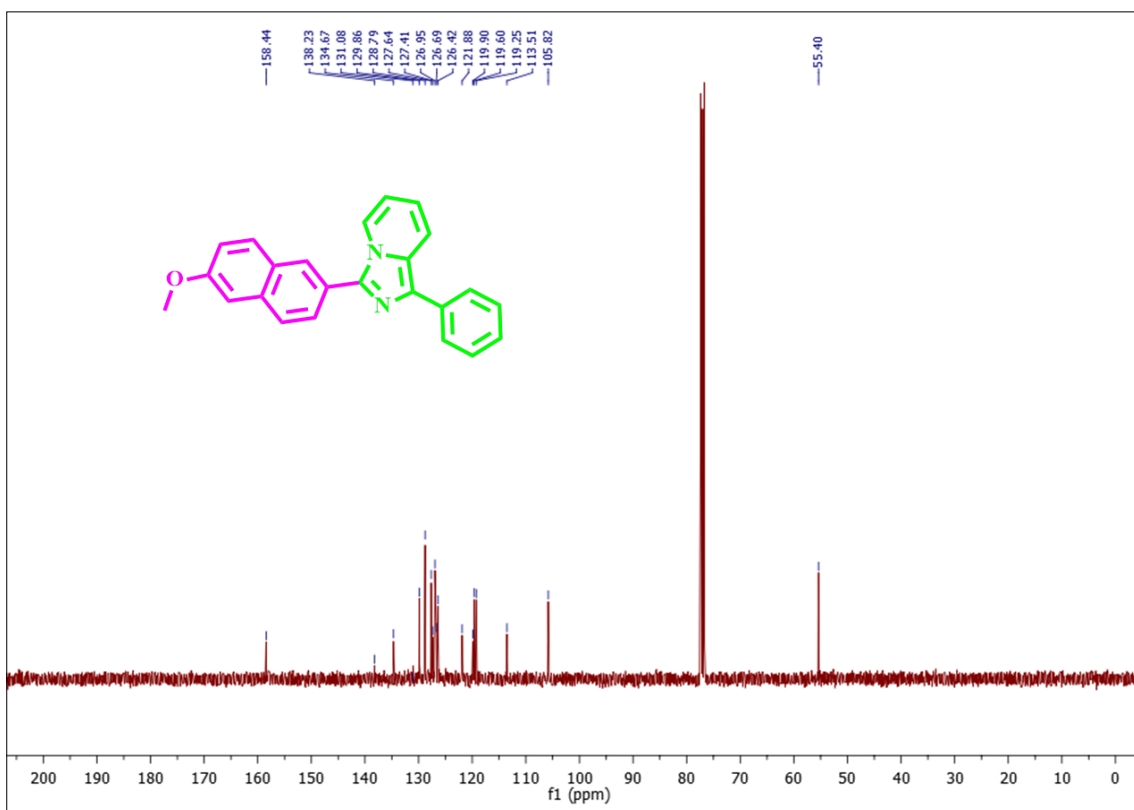

**Fig. S4.** <sup>13</sup>C NMR spectra of ImPy-2.

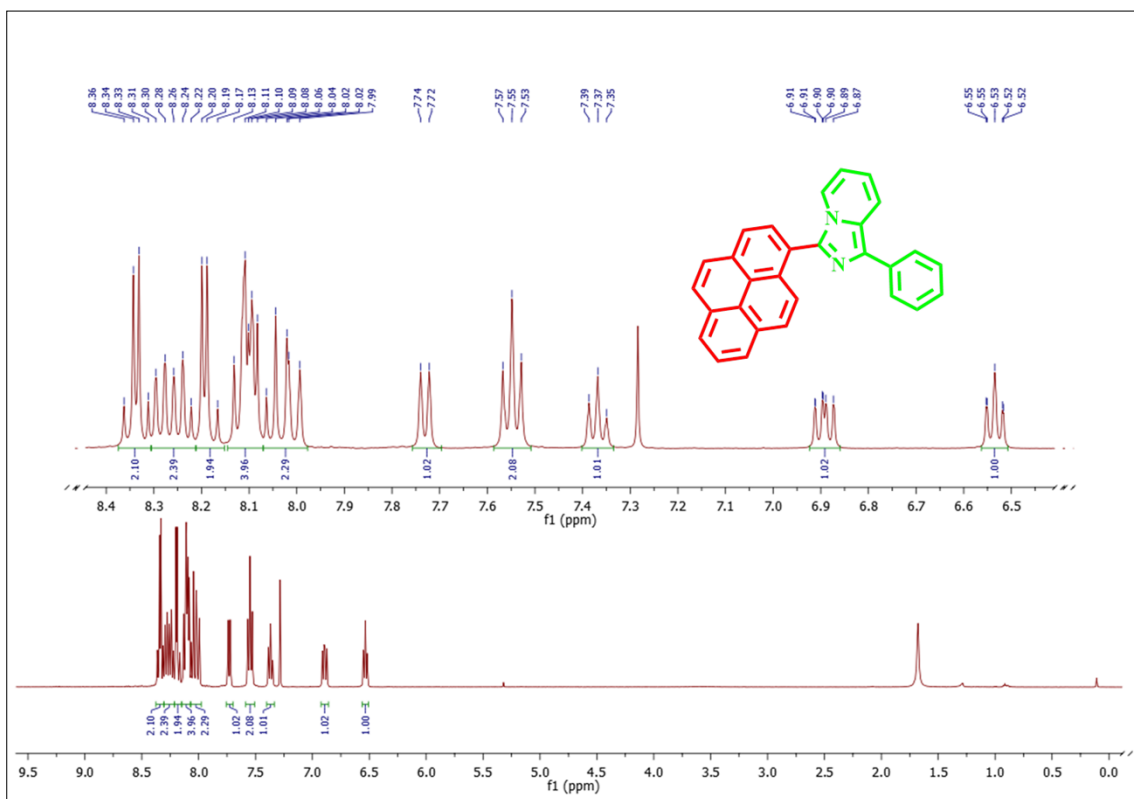

Fig. S5. <sup>1</sup>H NMR spectra of ImPy-3.

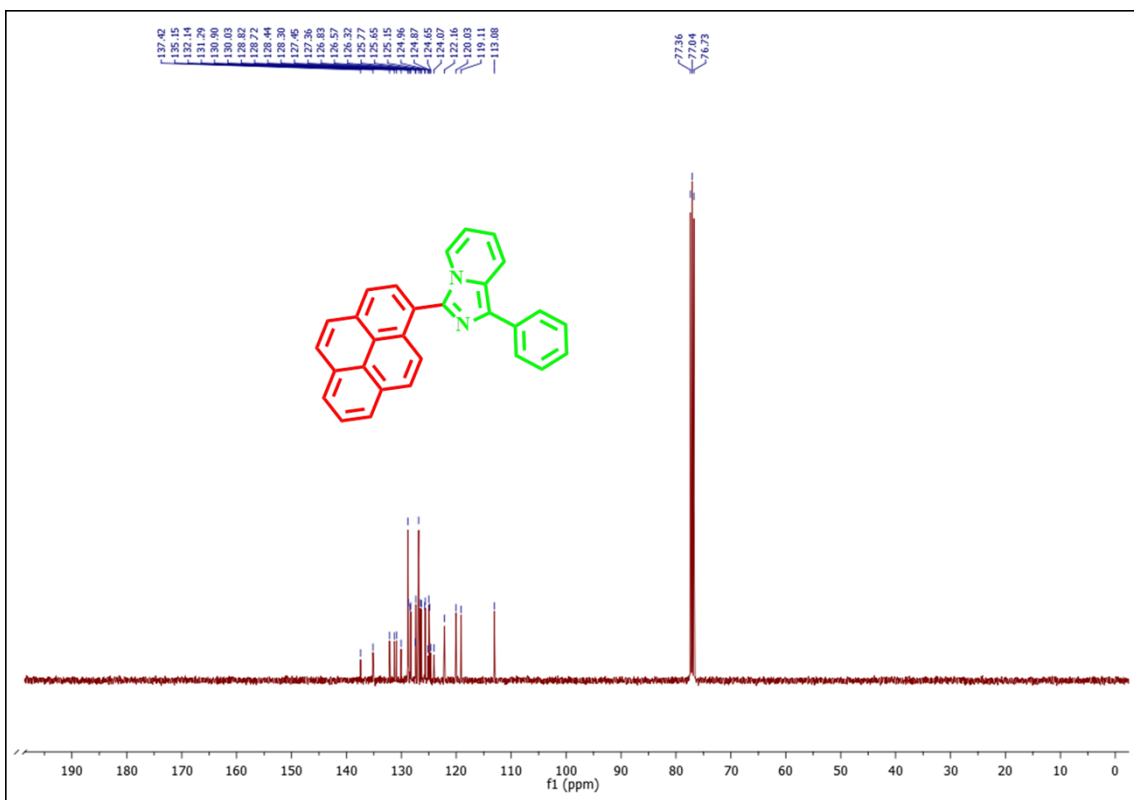

Fig. S6. <sup>13</sup>C NMR spectra of ImPy-3.

### SI3. Mass spectra of the molecules.

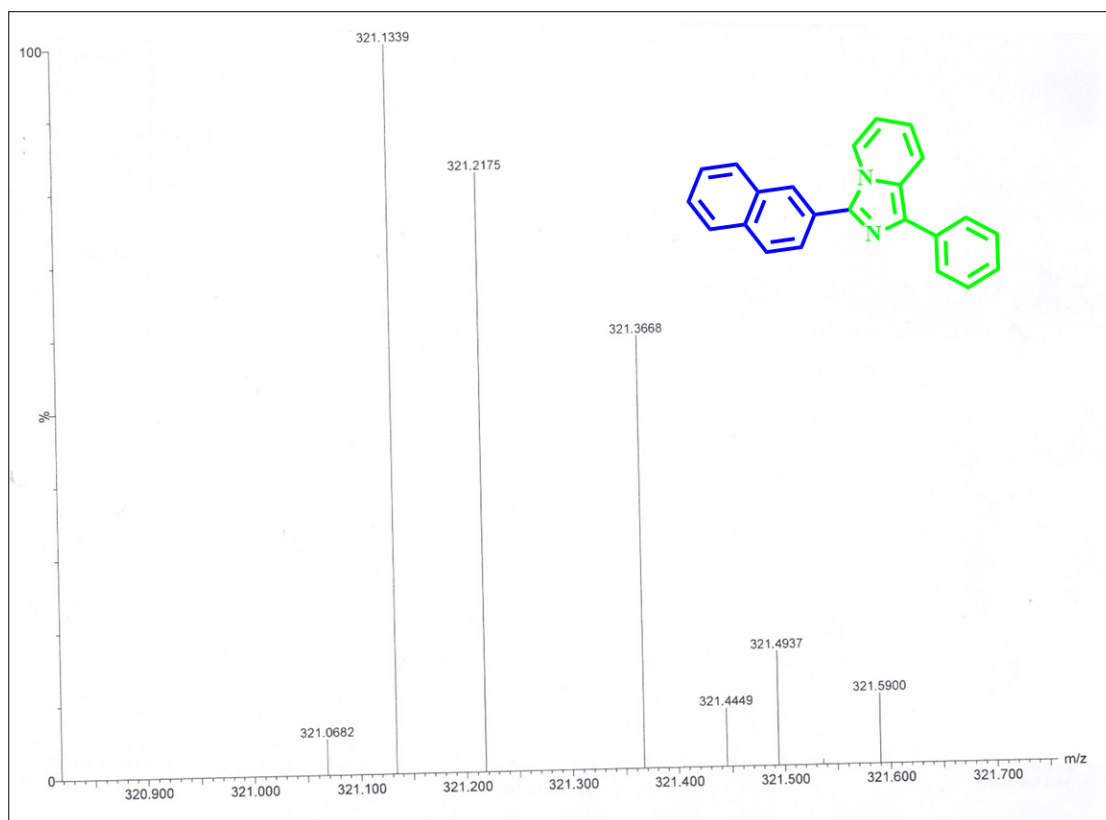

Fig. S7. Mass spectra of ImPy-1.

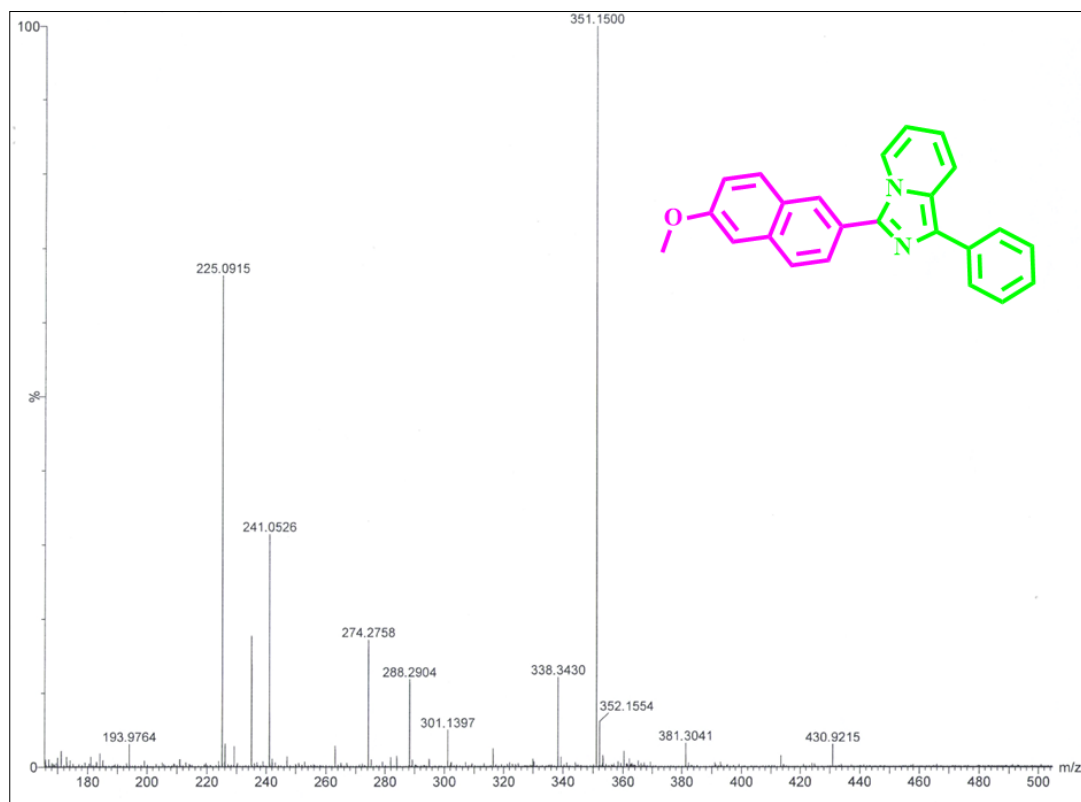

Fig. S8. Mass spectra of ImPy-2.



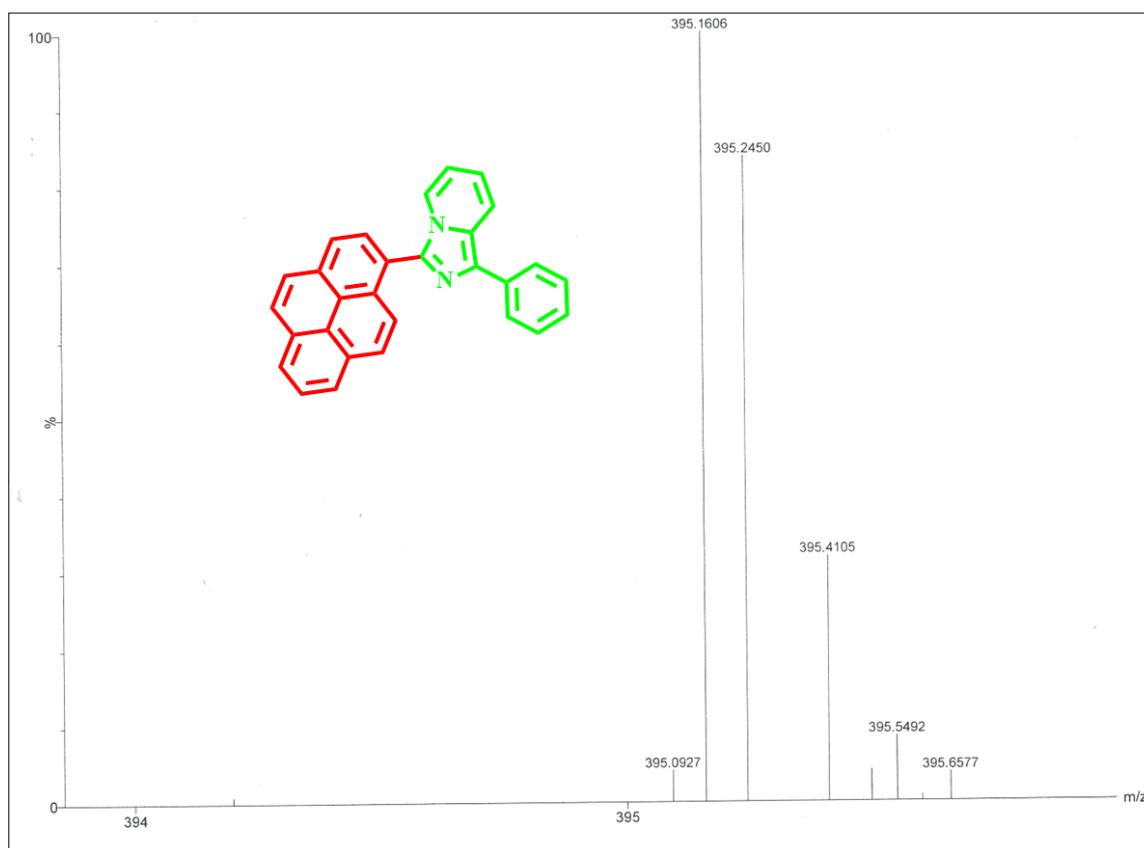

**Fig. S9.** Mass spectra of ImPy-3.

#### SI4. Single crystal analysis of ImPy-1 and ImPy-3.

**Table ST1.** Bond Lengths for ImPy-1.

| Atom   | Atom   | Length/Å   |  | Atom   | Atom   | Length/Å   |
|--------|--------|------------|--|--------|--------|------------|
| N(001) | C(008) | 1.3781(15) |  | C(00P) | C(00W) | 1.3534(17) |
| N(001) | C(00L) | 1.3890(15) |  | C(00P) | H(00P) | 0.9300     |
| N(001) | C(005) | 1.4027(14) |  | C(00Q) | C(010) | 1.3486(19) |
| N(002) | C(00C) | 1.3795(16) |  | C(00Q) | H(00Q) | 0.9300     |
| N(002) | C(00U) | 1.3870(16) |  | C(00R) | C(00X) | 1.3814(16) |
| N(002) | C(009) | 1.4038(14) |  | C(00R) | H(00R) | 0.9300     |
| N(003) | C(008) | 1.3269(15) |  | C(00S) | C(012) | 1.3504(18) |
| N(003) | C(006) | 1.3648(14) |  | C(00S) | H(00S) | 0.9300     |
| N(004) | C(00C) | 1.3252(14) |  | C(00T) | C(019) | 1.3766(18) |
| N(004) | C(00G) | 1.3679(15) |  | C(00T) | H(00T) | 0.9300     |
| C(005) | C(006) | 1.3891(18) |  | C(00U) | C(017) | 1.3410(19) |
| C(005) | C(00Q) | 1.4103(17) |  | C(00U) | H(00U) | 0.9300     |
| C(006) | C(00I) | 1.4694(16) |  | C(00V) | C(018) | 1.360(2)   |
| C(007) | C(00H) | 1.3788(16) |  | C(00V) | H(00V) | 0.9300     |
| C(007) | C(00P) | 1.4175(18) |  | C(00W) | H(00W) | 0.9300     |
| C(007) | C(00C) | 1.4629(16) |  | C(00X) | C(014) | 1.3850(19) |
| C(008) | C(00D) | 1.4637(16) |  | C(00X) | H(00X) | 0.9300     |

|        |        |            |  |        |        |            |
|--------|--------|------------|--|--------|--------|------------|
| C(009) | C(00G) | 1.3860(17) |  | C(00Y) | C(010) | 1.4178(18) |
| C(009) | C(00S) | 1.4130(17) |  | C(00Y) | H(00Y) | 0.9300     |
| C(00A) | C(00N) | 1.4129(17) |  | C(00Z) | C(01C) | 1.3760(18) |
| C(00A) | C(00V) | 1.4148(16) |  | C(00Z) | H(00Z) | 0.9300     |
| C(00A) | C(00B) | 1.4214(18) |  | C(010) | H(010) | 0.9300     |
| C(00B) | C(00E) | 1.4138(16) |  | C(011) | C(01B) | 1.3601(19) |
| C(00B) | C(013) | 1.4171(18) |  | C(011) | H(011) | 0.9300     |
| C(00D) | C(00E) | 1.3802(17) |  | C(012) | C(017) | 1.4138(19) |
| C(00D) | C(00M) | 1.4219(17) |  | C(012) | H(012) | 0.9300     |
| C(00E) | H(00E) | 0.9300     |  | C(013) | C(01A) | 1.3652(17) |
| C(00F) | C(00H) | 1.4116(16) |  | C(013) | H(013) | 0.9300     |
| C(00F) | C(00J) | 1.4138(18) |  | C(014) | C(015) | 1.379(2)   |
| C(00F) | C(011) | 1.4143(16) |  | C(014) | H(014) | 0.9300     |
| C(00G) | C(00K) | 1.4666(16) |  | C(015) | H(015) | 0.9300     |
| C(00H) | H(00H) | 0.9300     |  | C(016) | C(01E) | 1.363(2)   |
| C(00I) | C(00T) | 1.3902(18) |  | C(016) | H(016) | 0.9300     |
| C(00I) | C(00Z) | 1.3919(17) |  | C(017) | H(017) | 0.9300     |
| C(00J) | C(016) | 1.4124(17) |  | C(018) | C(01A) | 1.402(2)   |
| C(00J) | C(00W) | 1.4164(18) |  | C(018) | H(018) | 0.9300     |
| C(00K) | C(00R) | 1.3945(18) |  | C(019) | C(01D) | 1.379(2)   |
| C(00K) | C(00O) | 1.3999(17) |  | C(019) | H(019) | 0.9300     |
| C(00L) | C(00Y) | 1.3410(17) |  | C(01A) | H(01A) | 0.9300     |
| C(00L) | H(00L) | 0.9300     |  | C(01B) | C(01E) | 1.394(2)   |
| C(00M) | C(00N) | 1.3581(16) |  | C(01B) | H(01B) | 0.9300     |
| C(00M) | H(00M) | 0.9300     |  | C(01C) | C(01D) | 1.372(2)   |
| C(00N) | H(00N) | 0.9300     |  | C(01C) | H(01C) | 0.9300     |
| C(00O) | C(015) | 1.3781(17) |  | C(01D) | H(01D) | 0.9300     |
| C(00O) | H(00O) | 0.9300     |  | C(01E) | H(01E) | 0.9300     |

**Table ST2.** Bond angles for ImPy-1.

| Atom   | Atom   | Atom   | Angle/°    | Atom   | Atom   | Atom   | Angle/°    |
|--------|--------|--------|------------|--------|--------|--------|------------|
| C(008) | N(001) | C(00L) | 132.00(10) | C(005) | C(00Q) | H(00Q) | 119.9      |
| C(008) | N(001) | C(005) | 106.98(10) | C(00X) | C(00R) | C(00K) | 120.82(12) |
| C(00L) | N(001) | C(005) | 120.92(10) | C(00X) | C(00R) | H(00R) | 119.6      |
| C(00C) | N(002) | C(00U) | 132.26(10) | C(00K) | C(00R) | H(00R) | 119.6      |
| C(00C) | N(002) | C(009) | 107.01(9)  | C(012) | C(00S) | C(009) | 120.10(12) |
| C(00U) | N(002) | C(009) | 120.64(11) | C(012) | C(00S) | H(00S) | 119.9      |
| C(008) | N(003) | C(006) | 107.36(10) | C(009) | C(00S) | H(00S) | 119.9      |
| C(00C) | N(004) | C(00G) | 107.48(10) | C(019) | C(00T) | C(00I) | 120.57(13) |
| C(006) | C(005) | N(001) | 105.16(10) | C(019) | C(00T) | H(00T) | 119.7      |
| C(006) | C(005) | C(00Q) | 136.77(11) | C(00I) | C(00T) | H(00T) | 119.7      |
| N(001) | C(005) | C(00Q) | 118.00(11) | C(017) | C(00U) | N(002) | 119.48(12) |
| N(003) | C(006) | C(005) | 109.95(10) | C(017) | C(00U) | H(00U) | 120.3      |
| N(003) | C(006) | C(00I) | 122.81(11) | N(002) | C(00U) | H(00U) | 120.3      |
| C(005) | C(006) | C(00I) | 127.24(10) | C(018) | C(00V) | C(00A) | 120.97(13) |
| C(00H) | C(007) | C(00P) | 118.05(11) | C(018) | C(00V) | H(00V) | 119.5      |

|        |        |        |            |        |        |        |            |
|--------|--------|--------|------------|--------|--------|--------|------------|
| C(00H) | C(007) | C(00C) | 123.97(12) | C(00A) | C(00V) | H(00V) | 119.5      |
| C(00P) | C(007) | C(00C) | 117.96(10) | C(00P) | C(00W) | C(00J) | 121.61(13) |
| N(003) | C(008) | N(001) | 110.52(10) | C(00P) | C(00W) | H(00W) | 119.2      |
| N(003) | C(008) | C(00D) | 123.59(11) | C(00J) | C(00W) | H(00W) | 119.2      |
| N(001) | C(008) | C(00D) | 125.85(11) | C(00R) | C(00X) | C(014) | 120.30(13) |
| C(00G) | C(009) | N(002) | 105.23(10) | C(00R) | C(00X) | H(00X) | 119.8      |
| C(00G) | C(009) | C(00S) | 136.37(12) | C(014) | C(00X) | H(00X) | 119.8      |
| N(002) | C(009) | C(00S) | 118.37(11) | C(00L) | C(00Y) | C(010) | 120.80(13) |
| C(00N) | C(00A) | C(00V) | 122.96(12) | C(00L) | C(00Y) | H(00Y) | 119.6      |
| C(00N) | C(00A) | C(00B) | 118.13(11) | C(010) | C(00Y) | H(00Y) | 119.6      |
| C(00V) | C(00A) | C(00B) | 118.91(12) | C(01C) | C(00Z) | C(00I) | 121.37(14) |
| C(00E) | C(00B) | C(013) | 122.26(12) | C(01C) | C(00Z) | H(00Z) | 119.3      |
| C(00E) | C(00B) | C(00A) | 119.30(11) | C(00I) | C(00Z) | H(00Z) | 119.3      |
| C(013) | C(00B) | C(00A) | 118.44(11) | C(00Q) | C(010) | C(00Y) | 120.17(12) |
| N(004) | C(00C) | N(002) | 110.40(10) | C(00Q) | C(010) | H(010) | 119.9      |
| N(004) | C(00C) | C(007) | 124.03(12) | C(00Y) | C(010) | H(010) | 119.9      |
| N(002) | C(00C) | C(007) | 125.56(11) | C(01B) | C(011) | C(00F) | 120.95(14) |
| C(00E) | C(00D) | C(00M) | 118.41(11) | C(01B) | C(011) | H(011) | 119.5      |
| C(00E) | C(00D) | C(008) | 124.16(12) | C(00F) | C(011) | H(011) | 119.5      |
| C(00M) | C(00D) | C(008) | 117.37(11) | C(00S) | C(012) | C(017) | 119.88(13) |
| C(00D) | C(00E) | C(00B) | 121.51(12) | C(00S) | C(012) | H(012) | 120.1      |
| C(00D) | C(00E) | H(00E) | 119.2      | C(017) | C(012) | H(012) | 120.1      |
| C(00B) | C(00E) | H(00E) | 119.2      | C(01A) | C(013) | C(00B) | 120.91(13) |
| C(00H) | C(00F) | C(00J) | 119.14(11) | C(01A) | C(013) | H(013) | 119.5      |
| C(00H) | C(00F) | C(011) | 122.34(12) | C(00B) | C(013) | H(013) | 119.5      |
| C(00J) | C(00F) | C(011) | 118.51(11) | C(015) | C(014) | C(00X) | 119.62(12) |
| N(004) | C(00G) | C(009) | 109.88(10) | C(015) | C(014) | H(014) | 120.2      |
| N(004) | C(00G) | C(00K) | 121.23(11) | C(00X) | C(014) | H(014) | 120.2      |
| C(009) | C(00G) | C(00K) | 128.89(11) | C(00O) | C(015) | C(014) | 120.30(13) |
| C(007) | C(00H) | C(00F) | 121.90(12) | C(00O) | C(015) | H(015) | 119.8      |
| C(007) | C(00H) | H(00H) | 119.0      | C(014) | C(015) | H(015) | 119.8      |
| C(00F) | C(00H) | H(00H) | 119.0      | C(01E) | C(016) | C(00J) | 120.42(15) |
| C(00T) | C(00I) | C(00Z) | 117.72(11) | C(01E) | C(016) | H(016) | 119.8      |
| C(00T) | C(00I) | C(006) | 121.86(11) | C(00J) | C(016) | H(016) | 119.8      |
| C(00Z) | C(00I) | C(006) | 120.42(12) | C(00U) | C(017) | C(012) | 121.35(13) |
| C(016) | C(00J) | C(00F) | 119.12(12) | C(00U) | C(017) | H(017) | 119.3      |
| C(016) | C(00J) | C(00W) | 122.83(13) | C(012) | C(017) | H(017) | 119.3      |
| C(00F) | C(00J) | C(00W) | 118.05(11) | C(00V) | C(018) | C(01A) | 120.34(13) |
| C(00R) | C(00K) | C(00O) | 117.96(11) | C(00V) | C(018) | H(018) | 119.8      |
| C(00R) | C(00K) | C(00G) | 120.37(11) | C(01A) | C(018) | H(018) | 119.8      |
| C(00O) | C(00K) | C(00G) | 121.62(12) | C(00T) | C(019) | C(01D) | 120.82(15) |
| C(00Y) | C(00L) | N(001) | 119.49(12) | C(00T) | C(019) | H(019) | 119.6      |
| C(00Y) | C(00L) | H(00L) | 120.3      | C(01D) | C(019) | H(019) | 119.6      |
| N(001) | C(00L) | H(00L) | 120.3      | C(013) | C(01A) | C(018) | 120.41(13) |
| C(00N) | C(00M) | C(00D) | 121.04(12) | C(013) | C(01A) | H(01A) | 119.8      |
| C(00N) | C(00M) | H(00M) | 119.5      | C(018) | C(01A) | H(01A) | 119.8      |
| C(00D) | C(00M) | H(00M) | 119.5      | C(011) | C(01B) | C(01E) | 120.30(13) |

|        |        |        |            |        |        |        |            |
|--------|--------|--------|------------|--------|--------|--------|------------|
| C(00M) | C(00N) | C(00A) | 121.59(12) | C(011) | C(01B) | H(01B) | 119.8      |
| C(00M) | C(00N) | H(00N) | 119.2      | C(01E) | C(01B) | H(01B) | 119.8      |
| C(00A) | C(00N) | H(00N) | 119.2      | C(01D) | C(01C) | C(00Z) | 120.17(14) |
| C(015) | C(00O) | C(00K) | 120.98(13) | C(01D) | C(01C) | H(01C) | 119.9      |
| C(015) | C(00O) | H(00O) | 119.5      | C(00Z) | C(01C) | H(01C) | 119.9      |
| C(00K) | C(00O) | H(00O) | 119.5      | C(01C) | C(01D) | C(019) | 119.31(13) |
| C(00W) | C(00P) | C(007) | 121.17(11) | C(01C) | C(01D) | H(01D) | 120.3      |
| C(00W) | C(00P) | H(00P) | 119.4      | C(019) | C(01D) | H(01D) | 120.3      |
| C(007) | C(00P) | H(00P) | 119.4      | C(016) | C(01E) | C(01B) | 120.68(13) |
| C(010) | C(00Q) | C(005) | 120.28(12) | C(016) | C(01E) | H(01E) | 119.7      |
| C(010) | C(00Q) | H(00Q) | 119.9      | C(01B) | C(01E) | H(01E) | 119.7      |

**Table ST3.** Bond Lengths for ImPy-3.

| Atom   | Atom   | Length/Å | Atom   | Atom   | Length/Å |
|--------|--------|----------|--------|--------|----------|
| N(001) | C(00G) | 1.382(3) | C(00F) | H(00F) | 0.9300   |
| N(001) | C(00A) | 1.388(3) | C(00G) | C(00J) | 1.345(4) |
| N(001) | C(006) | 1.410(3) | C(00G) | H(00G) | 0.9300   |
| N(002) | C(00A) | 1.319(3) | C(00H) | C(00T) | 1.373(4) |
| N(002) | C(008) | 1.385(3) | C(00H) | C(00K) | 1.432(4) |
| C(003) | C(005) | 1.397(4) | C(00I) | H(00I) | 0.9300   |
| C(003) | C(00D) | 1.434(4) | C(00J) | C(00N) | 1.420(4) |
| C(003) | C(009) | 1.439(4) | C(00J) | H(00J) | 0.9300   |
| C(004) | C(00C) | 1.383(4) | C(00K) | H(00K) | 0.9300   |
| C(004) | C(00M) | 1.432(4) | C(00L) | C(00Q) | 1.375(4) |
| C(004) | C(009) | 1.447(4) | C(00L) | H(00L) | 0.9300   |
| C(005) | C(00I) | 1.371(4) | C(00M) | C(00P) | 1.377(5) |
| C(005) | C(00A) | 1.484(4) | C(00M) | H(00M) | 0.9300   |
| C(006) | C(008) | 1.379(4) | C(00N) | H(00N) | 0.9300   |
| C(006) | C(00F) | 1.412(4) | C(00O) | C(00S) | 1.391(4) |
| C(007) | C(00O) | 1.378(4) | C(00O) | H(00O) | 0.9300   |
| C(007) | C(00L) | 1.388(4) | C(00P) | H(00P) | 0.9300   |
| C(007) | C(008) | 1.471(4) | C(00Q) | C(00R) | 1.365(5) |
| C(009) | C(00B) | 1.405(4) | C(00Q) | H(00Q) | 0.9300   |
| C(00B) | C(00E) | 1.416(4) | C(00R) | C(00S) | 1.372(5) |
| C(00B) | C(00H) | 1.430(4) | C(00R) | H(00R) | 0.9300   |
| C(00C) | C(00I) | 1.369(4) | C(00S) | H(00S) | 0.9300   |
| C(00C) | H(00C) | 0.9300   | C(00T) | C(00V) | 1.380(5) |
| C(00D) | C(00K) | 1.356(4) | C(00T) | H(00T) | 0.9300   |
| C(00D) | H(00D) | 0.9300   | C(00U) | C(00V) | 1.366(5) |
| C(00E) | C(00U) | 1.406(5) | C(00U) | H(00U) | 0.9300   |
| C(00E) | C(00P) | 1.438(5) | C(00V) | H(00V) | 0.9300   |
| C(00F) | C(00N) | 1.361(4) |        |        |          |

**Table ST4.** Bond angles for ImPy-3.

| Atom    | Atom   | Atom   | Angle/°    | Atom   | Atom   | Atom   | Angle/°    |
|---------|--------|--------|------------|--------|--------|--------|------------|
| C(008)  | N(001) | C(00L) | 132.00(10) | C(005) | C(00Q) | H(00Q) | 119.9      |
| C(008)  | N(001) | C(005) | 106.98(10) | C(00X) | C(00R) | C(00K) | 120.82(12) |
| C(00L)  | N(001) | C(005) | 120.92(10) | C(00X) | C(00R) | H(00R) | 119.6      |
| C(00C)  | N(002) | C(00U) | 132.26(10) | C(00K) | C(00R) | H(00R) | 119.6      |
| C(00C)  | N(002) | C(009) | 107.01(9)  | C(012) | C(00S) | C(009) | 120.10(12) |
| C(00U)  | N(002) | C(009) | 120.64(11) | C(012) | C(00S) | H(00S) | 119.9      |
| C(008)  | N(003) | C(006) | 107.36(10) | C(009) | C(00S) | H(00S) | 119.9      |
| C(00C)  | N(004) | C(00G) | 107.48(10) | C(019) | C(00T) | C(00I) | 120.57(13) |
| C(006)  | C(005) | N(001) | 105.16(10) | C(019) | C(00T) | H(00T) | 119.7      |
| C(006)  | C(005) | C(00Q) | 136.77(11) | C(00I) | C(00T) | H(00T) | 119.7      |
| N(001)  | C(005) | C(00Q) | 118.00(11) | C(017) | C(00U) | N(002) | 119.48(12) |
| N(003)  | C(006) | C(005) | 109.95(10) | C(017) | C(00U) | H(00U) | 120.3      |
| N(003)  | C(006) | C(00I) | 122.81(11) | N(002) | C(00U) | H(00U) | 120.3      |
| C(005)  | C(006) | C(00I) | 127.24(10) | C(018) | C(00V) | C(00A) | 120.97(13) |
| C(00H)  | C(007) | C(00P) | 118.05(11) | C(018) | C(00V) | H(00V) | 119.5      |
| C(00H)  | C(007) | C(00C) | 123.97(12) | C(00A) | C(00V) | H(00V) | 119.5      |
| C(00P)  | C(007) | C(00C) | 117.96(10) | C(00P) | C(00W) | C(00J) | 121.61(13) |
| N(003)  | C(008) | N(001) | 110.52(10) | C(00P) | C(00W) | H(00W) | 119.2      |
| N(003)  | C(008) | C(00D) | 123.59(11) | C(00J) | C(00W) | H(00W) | 119.2      |
| N(001)  | C(008) | C(00D) | 125.85(11) | C(00R) | C(00X) | C(014) | 120.30(13) |
| C(00G)  | C(009) | N(002) | 105.23(10) | C(00R) | C(00X) | H(00X) | 119.8      |
| C(00G)  | C(009) | C(00S) | 136.37(12) | C(014) | C(00X) | H(00X) | 119.8      |
| N(002)  | C(009) | C(00S) | 118.37(11) | C(00L) | C(00Y) | C(010) | 120.80(13) |
| C(00N)  | C(00A) | C(00V) | 122.96(12) | C(00L) | C(00Y) | H(00Y) | 119.6      |
| C(00N)  | C(00A) | C(00B) | 118.13(11) | C(010) | C(00Y) | H(00Y) | 119.6      |
| C(00V)  | C(00A) | C(00B) | 118.91(12) | C(01C) | C(00Z) | C(00I) | 121.37(14) |
| C(00E)- | C(00B) | C(013) | 122.26(12) | C(01C) | C(00Z) | H(00Z) | 119.3      |
| C(00E)  | C(00B) | C(00A) | 119.30(11) | C(00I) | C(00Z) | H(00Z) | 119.3      |
| C(013)  | C(00B) | C(00A) | 118.44(11) | C(00Q) | C(010) | C(00Y) | 120.17(12) |
| N(004)  | C(00C) | N(002) | 110.40(10) | C(00Q) | C(010) | H(010) | 119.9      |
| N(004)  | C(00C) | C(007) | 124.03(12) | C(00Y) | C(010) | H(010) | 119.9      |
| N(002)  | C(00C) | C(007) | 125.56(11) | C(01B) | C(011) | C(00F) | 120.95(14) |
| C(00E)  | C(00D) | C(00M) | 118.41(11) | C(01B) | C(011) | H(011) | 119.5      |
| C(00E)  | C(00D) | C(008) | 124.16(12) | C(00F) | C(011) | H(011) | 119.5      |
| C(00M)  | C(00D) | C(008) | 117.37(11) | C(00S) | C(012) | C(017) | 119.88(13) |
| C(00D)  | C(00E) | C(00B) | 121.51(12) | C(00S) | C(012) | H(012) | 120.1      |
| C(00D)  | C(00E) | H(00E) | 119.2      | C(017) | C(012) | H(012) | 120.1      |
| C(00B)  | C(00E) | H(00E) | 119.2      | C(01A) | C(013) | C(00B) | 120.91(13) |
| C(00H)  | C(00F) | C(00J) | 119.14(11) | C(01A) | C(013) | H(013) | 119.5      |
| C(00H)  | C(00F) | C(011) | 122.34(12) | C(00B) | C(013) | H(013) | 119.5      |
| C(00J)  | C(00F) | C(011) | 118.51(11) | C(015) | C(014) | C(00X) | 119.62(12) |
| N(004)  | C(00G) | C(009) | 109.88(10) | C(015) | C(014) | H(014) | 120.2      |
| N(004)  | C(00G) | C(00K) | 121.23(11) | C(00X) | C(014) | H(014) | 120.2      |
| C(009)  | C(00G) | C(00K) | 128.89(11) | C(00O) | C(015) | C(014) | 120.30(13) |
| C(007)  | C(00H) | C(00F) | 121.90(12) | C(00O) | C(015) | H(015) | 119.8      |

|        |        |        |            |        |        |        |            |
|--------|--------|--------|------------|--------|--------|--------|------------|
| C(007) | C(00H) | H(00H) | 119.0      | C(014) | C(015) | H(015) | 119.8      |
| C(00F) | C(00H) | H(00H) | 119.0      | C(01E) | C(016) | C(00J) | 120.42(15) |
| C(00T) | C(00I) | C(00Z) | 117.72(11) | C(01E) | C(016) | H(016) | 119.8      |
| C(00T) | C(00I) | C(006) | 121.86(11) | C(00J) | C(016) | H(016) | 119.8      |
| C(00Z) | C(00I) | C(006) | 120.42(12) | C(00U) | C(017) | C(012) | 121.35(13) |
| C(016) | C(00J) | C(00F) | 119.12(12) | C(00U) | C(017) | H(017) | 119.3      |
| C(016) | C(00J) | C(00W) | 122.83(13) | C(012) | C(017) | H(017) | 119.3      |
| C(00F) | C(00J) | C(00W) | 118.05(11) | C(00V) | C(018) | C(01A) | 120.34(13) |
| C(00R) | C(00K) | C(00O) | 117.96(11) | C(00V) | C(018) | H(018) | 119.8      |
| C(00R) | C(00K) | C(00G) | 120.37(11) | C(01A) | C(018) | H(018) | 119.8      |
| C(00O) | C(00K) | C(00G) | 121.62(12) | C(00T) | C(019) | C(01D) | 120.82(15) |
| C(00Y) | C(00L) | N(001) | 119.49(12) | C(00T) | C(019) | H(019) | 119.6      |
| C(00Y) | C(00L) | H(00L) | 120.3      | C(01D) | C(019) | H(019) | 119.6      |
| N(001) | C(00L) | H(00L) | 120.3      | C(013) | C(01A) | C(018) | 120.41(13) |
| C(00N) | C(00M) | C(00D) | 121.04(12) | C(013) | C(01A) | H(01A) | 119.8      |
| C(00N) | C(00M) | H(00M) | 119.5      | C(018) | C(01A) | H(01A) | 119.8      |
| C(00D) | C(00M) | H(00M) | 119.5      | C(011) | C(01B) | C(01E) | 120.30(13) |
| C(00M) | C(00N) | C(00A) | 121.59(12) | C(011) | C(01B) | H(01B) | 119.8      |
| C(00M) | C(00N) | H(00N) | 119.2      | C(01E) | C(01B) | H(01B) | 119.8      |
| C(00A) | C(00N) | H(00N) | 119.2      | C(01D) | C(01C) | C(00Z) | 120.17(14) |
| C(015) | C(00O) | C(00K) | 120.98(13) | C(01D) | C(01C) | H(01C) | 119.9      |
| C(015) | C(00O) | H(00O) | 119.5      | C(00Z) | C(01C) | H(01C) | 119.9      |
| C(00K) | C(00O) | H(00O) | 119.5      | C(01C) | C(01D) | C(019) | 119.31(13) |
| C(00W) | C(00P) | C(007) | 121.17(11) | C(01C) | C(01D) | H(01D) | 120.3      |
| C(00W) | C(00P) | H(00P) | 119.4      | C(019) | C(01D) | H(01D) | 120.3      |
| C(007) | C(00P) | H(00P) | 119.4      | C(016) | C(01E) | C(01B) | 120.68(13) |
| C(010) | C(00Q) | C(005) | 120.28(12) | C(016) | C(01E) | H(01E) | 119.7      |
| C(010) | C(00Q) | H(00Q) | 119.9      | C(01B) | C(01E) | H(01E) | 119.7      |

### SI5. Photophysical properties of ImPy derivatives.

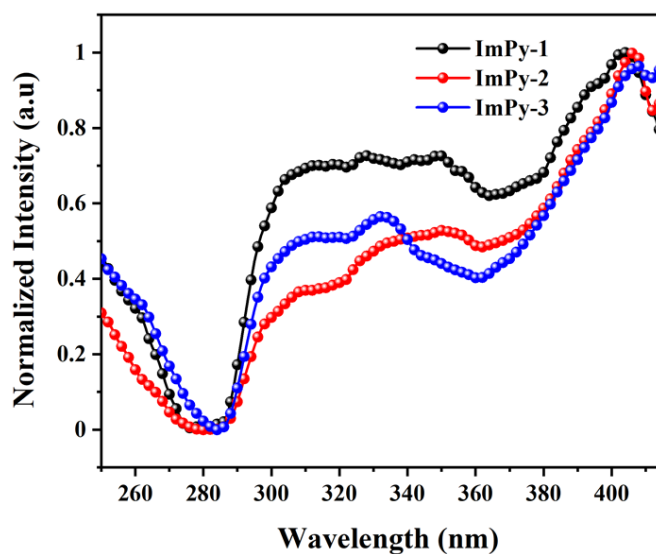

**Fig. S10.** Normalized PL excitation spectra of the ImPy derivatives in solid states.

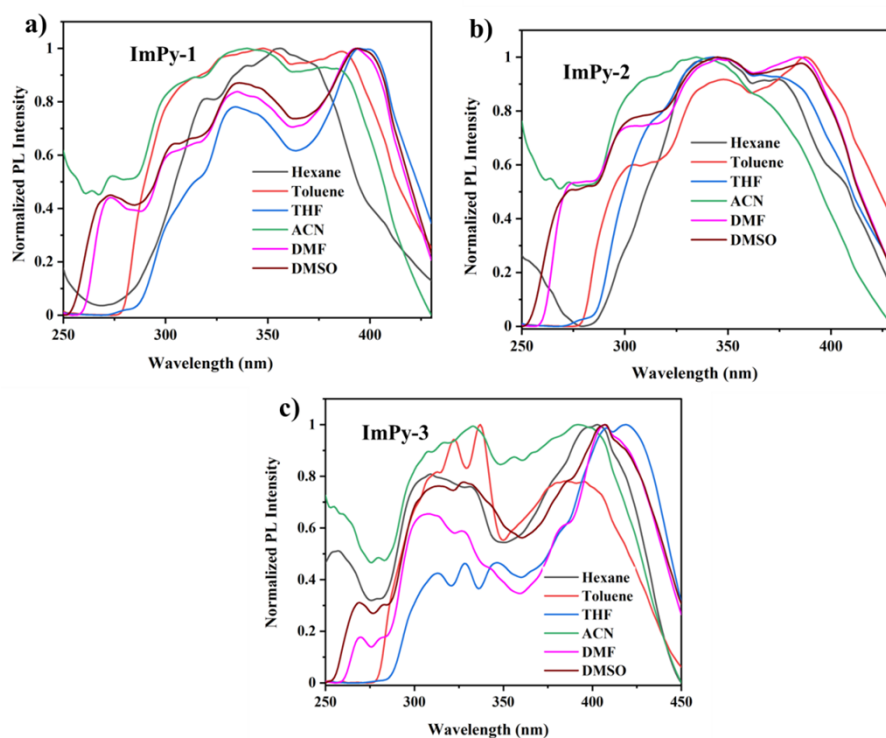

**Fig. S11.** Normalized PL excitation spectra of the ImPy derivatives in different solvents.

**Table ST5.** Molar extinction coefficient ( $\epsilon$ ) data for ImPy-1, ImPy-2 and ImPy-3.

| Fluorophores  | $\lambda_{\max}$<br>(nm) | Molar extinction<br>coefficient ( $\epsilon$ ) $\text{cm}^{-1}/\text{M}$ |
|---------------|--------------------------|--------------------------------------------------------------------------|
| <b>ImPy-1</b> | 234                      | 29656                                                                    |
|               | 291                      | 10705                                                                    |
|               | 360                      | 8734                                                                     |
| <b>ImPy-2</b> | 293                      | 11501                                                                    |
|               | 313                      | 9602                                                                     |
| <b>ImPy-3</b> | 255                      | 10687                                                                    |
|               | 297                      | 9928                                                                     |
|               | 356                      | 8354                                                                     |

**Table ST6.** The CIE color coordinates of ImPy derivatives in solution and solid.

| Fluorophores  | Solution     | Solid        |
|---------------|--------------|--------------|
|               | CIE (x, y)   | CIE (x, y)   |
| <b>ImPy-1</b> | (0.20, 0.32) | (0.21, 0.38) |

|               |              |              |
|---------------|--------------|--------------|
| <b>ImPy-2</b> | (0.17, 0.22) | (0.19, 0.37) |
| <b>ImPy-3</b> | (0.16, 0.22) | (0.25, 0.47) |

**Table ST7.** Fluorescence life time data of ImPy derivatives.

| Fluorophore   | Excitation wavelength<br>(nm) | Emission wavelength<br>(nm) | Life time ( $\tau$ )<br>(ns) |
|---------------|-------------------------------|-----------------------------|------------------------------|
| <b>ImPy-1</b> | 400                           | 489                         | 4.06                         |
| <b>ImPy-2</b> | 380                           | 462                         | 3.89                         |
| <b>ImPy-3</b> | 419                           | 477                         | 1.81                         |

**SI6.** The calculated UV-vis absorption spectra and vertical excitation wavelengths, orbital contribution and oscillator strength ( $f$ ) of ImPy derivatives.

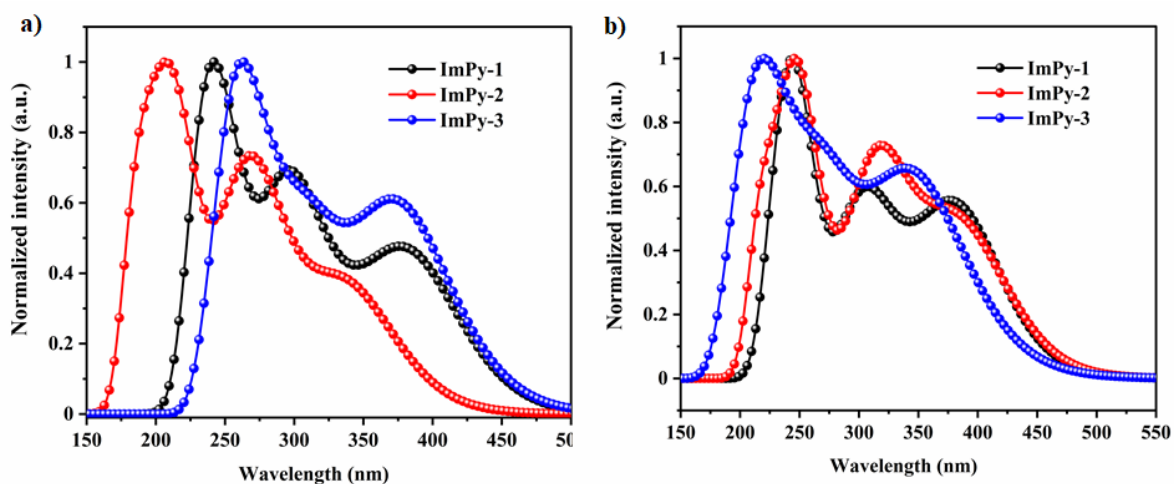

**Fig. S12.** Simulated UV-vis absorption spectra of the fluorophores Gas and in DCM phase.

**Table ST8.** The computed vertical transition and their oscillator strengths ( $f$ ) and configuration of the ImPy derivatives

| Compound                 | State | Energy (eV) | $\lambda_{\max}$<br>nm | $f$    | Configuration                                                             |
|--------------------------|-------|-------------|------------------------|--------|---------------------------------------------------------------------------|
| <b>ImPy-1</b><br>Singlet | Gas   | 3.1636      | 391.91                 | 0.0582 | HOMO $\rightarrow$ LUMO (52.26%).                                         |
|                          |       | 3.2479      | 381.74                 | 0.2821 | HOMO- $\rightarrow$ LUMO (45.88%).<br>HOMO $\rightarrow$ LUMO+1 (52.54%). |
|                          |       | 3.7940      | 326.79                 | 0.1617 | HOMO $\rightarrow$ LUMO+1 (66.04%).                                       |



|                          |     |        |        |        |                                                                                                                                                                    |
|--------------------------|-----|--------|--------|--------|--------------------------------------------------------------------------------------------------------------------------------------------------------------------|
|                          |     | 4.1635 | 297.79 | 0.3150 | HOMO → LUMO+1 (11.19%).<br>HOMO → LUMO+3 (67.56%).                                                                                                                 |
|                          |     | 4.2226 | 293.62 | 0.0633 | HOMO-1 → LUMO (64.06%).<br>HOMO → LUMO+2 (16.43%).                                                                                                                 |
|                          |     | 4.8793 | 254.10 | 0.2248 | HOMO-3 → LUMO (27.07%).<br>HOMO-2 → LUMO (16.79%).<br>HOMO → LUMO+5 (54.69%).                                                                                      |
|                          | DCM | 3.1936 | 388.23 | 0.2417 | HOMO → LUMO (69.44%).                                                                                                                                              |
|                          |     | 3.2624 | 380.04 | 0.2840 | HOMO- → LUMO+1 (68.64%).                                                                                                                                           |
|                          |     | 3.7604 | 329.71 | 0.2023 | HOMO → LUMO+2 (67.13%).                                                                                                                                            |
|                          |     | 4.0640 | 305.08 | 0.3608 | HOMO → LUMO+3 (68.26%).                                                                                                                                            |
|                          |     | 4.2228 | 293.61 | 0.0916 | HOMO-1 → LUMO (64.21%).<br>HOMO → LUMO+2 (16.54%).                                                                                                                 |
|                          |     | 4.3115 | 287.57 | 0.0365 | HOMO → LUMO+4 (67.59%).                                                                                                                                            |
|                          |     | 4.9111 | 252.46 | 0.4987 | HOMO-1 → LUMO (64.21%).<br>HOMO → LUMO+2 (16.54%).                                                                                                                 |
|                          |     | 5.1100 | 242.63 | 0.2420 | HOMO-5 → LUMO (13.68%).<br>HOMO-4 → LUMO (26.12%).<br>HOMO-1 → LUMO+2 (26.55%).<br>HOMO-1 → LUMO+3 (15.89%).<br>HOMO → LUMO+4 (23.52%).<br>HOMO → LUMO+5 (31.70%). |
| Triplet                  | GAS | 2.2394 | 553.65 | 0      | HOMO → LUMO+1 (50.99%).                                                                                                                                            |
|                          | DCM | 2.3041 | 538.10 | 0      | HOMO → LUMO (57.37%).                                                                                                                                              |
| <b>ImPy-2</b><br>Singlet | Gas | 3.1045 | 399.36 | 0.0464 | HOMO → LUMO (51.98%).                                                                                                                                              |
|                          |     | 3.2005 | 387.39 | 0.2704 | HOMO → LUMO (45.87%).<br>HOMO → LUMO+1 (52.36%).                                                                                                                   |
|                          |     | 3.7897 | 327.16 | 0.3072 | HOMO → LUMO+2 (66.19%).                                                                                                                                            |
|                          |     | 4.0919 | 303.00 | 0.3696 | HOMO → LUMO+2 (11.71%).<br>HOMO → LUMO+3 (63.67%).                                                                                                                 |
|                          |     | 4.7285 | 262.21 | 0.1265 | HOMO-2 → LUMO+1 (56.76%).                                                                                                                                          |
|                          |     | 4.8172 | 257.38 | 0.1744 | HOMO-2 → LUMO (15.18%).<br>HOMO-2 → LUMO+1 (14.98%).<br>HOMO-1 → LUMO+2 (29.75%).                                                                                  |

|                          |     |        |        |        |                                                                                                                                       |
|--------------------------|-----|--------|--------|--------|---------------------------------------------------------------------------------------------------------------------------------------|
|                          |     |        |        |        | HOMO → LUMO+5 (57.26%).                                                                                                               |
|                          |     | 4.9511 | 250.42 | 0.2161 | HOMO-3 → LUMO (16.90%).<br>HOMO-3 → LUMO+1 (32.65%).<br>HOMO → LUMO+5 (20.07%).                                                       |
|                          |     | 5.4500 | 227.49 | 0.1730 | HOMO-2 → LUMO+2 (49.42%).<br>HOMO-1 → LUMO+3 (12.82%).                                                                                |
|                          | DCM | 3.1536 | 393.15 | 0.1573 | HOMO → LUMO (66.66%).                                                                                                                 |
|                          |     | 3.2067 | 386.64 | 0.3373 | HOMO → LUMO (21.04%).<br>HOMO → LUMO+1 (66.07%).                                                                                      |
|                          |     | 3.7433 | 331.22 | 0.3921 | HOMO → LUMO+2 (67.35%).                                                                                                               |
|                          |     | 3.9901 | 310.73 | 0.2941 | HOMO → LUMO+3 (47.43%).                                                                                                               |
|                          |     | 4.7988 | 258.36 | 0.4124 | HOMO-2 → LUMO+1 (43.47%).                                                                                                             |
|                          |     | 4.9565 | 250.14 | 0.1066 | HOMO-2 → LUMO (17.54%).<br>HOMO-1 → LUMO+2 (14.40%).<br>HOMO-1 → LUMO+3 (54.28%).                                                     |
|                          |     | 5.0620 | 244.93 | 0.3585 | HOMO-4 → LUMO (14.13%).<br>HOMO-3 → LUMO (34.87%).<br>HOMO-1 → LUMO+3 (26.63%).<br>HOMO → LUMO+5 (19.69%).<br>HOMO → LUMO+6 (24.61%). |
| Triplet                  | Gas | 2.2075 | 561.66 | 0      | HOMO-1 → LUMO+1 (16.34%).<br>HOMO → LUMO (47.58%).                                                                                    |
|                          | DCM | 2.2721 | 545.69 | 0      | HOMO-1 → LUMO+1 (53.11%).                                                                                                             |
| <b>ImPy-3</b><br>Singlet | Gas | 2.8094 | 441.32 | 0.3120 | HOMO → LUMO (69.29%).                                                                                                                 |
|                          |     | 3.4551 | 358.84 | 0.1168 | HOMO-2 → LUMO (23.50%).<br>HOMO → LUMO+2 (56.20%).                                                                                    |
|                          |     | 3.6144 | 343.03 | 0.1775 | HOMO-2 → LUMO (18.09%).<br>HOMO-1 → LUMO (58.02%).<br>HOMO → LUMO+2 (27.80%).                                                         |
|                          |     | 4.0571 | 305.60 | 0.0993 | HOMO → LUMO+3 (56.40%).<br>HOMO → LUMO+4 (33.90%).                                                                                    |
|                          |     | 4.1097 | 301.69 | 0.1421 | HOMO-1 → LUMO+4 (11.35%).<br>HOMO → LUMO+4 (57.42%).                                                                                  |
|                          |     | 4.4451 | 278.92 | 0.1718 | HOMO-1 → LUMO+2 (15.48%).                                                                                                             |

|         |     |        |        |        |                                                                                                            |
|---------|-----|--------|--------|--------|------------------------------------------------------------------------------------------------------------|
|         |     |        |        |        | HOMO → LUMO+5 (25.06%).<br>HOMO → LUMO+6 (54.51%).                                                         |
|         |     | 4.4868 | 276.33 | 0.0879 | HOMO-4 → LUMO (11.56%).<br>HOMO-3 → LUMO (45.71%).<br>HOMO-2 → LUMO (29.17%).                              |
|         |     | 4.7533 | 260.84 | 0.0876 | HOMO-1 → LUMO+4 (51.59%).<br>HOMO-1 → LUMO+5 (12.31%).                                                     |
|         | DCM | 2.7506 | 450.76 | 0.4291 | HOMO → LUMO (69.85%).                                                                                      |
|         |     | 3.1998 | 387.48 | 0.1310 | HOMO → LUMO+1 (69.06%).                                                                                    |
|         |     | 3.4390 | 360.53 | 0.1577 | HOMO-2 → LUMO (20.94%).<br>HOMO → LUMO+2 (54.88%).                                                         |
|         |     | 3.5930 | 345.07 | 0.2296 | HOMO-2 → LUMO (17.22%).<br>HOMO-1 → LUMO (57.08%).<br>HOMO → LUMO+2 (32.55%).                              |
|         |     | 4.0076 | 309.38 | 0.2295 | HOMO → LUMO+3 (48.51%).<br>HOMO → LUMO+4 (13.54%).                                                         |
|         |     | 4.0491 | 306.20 | 0.1167 | HOMO-1 → LUMO+4 (11.64%).<br>HOMO → LUMO+4 (64.82%).                                                       |
|         |     | 4.3810 | 283.00 | 0.2366 | HOMO-5 → LUMO (22.61%).<br>HOMO-4 → LUMO (21.49%).<br>HOMO-1 → LUMO+2 (37.93%).<br>HOMO → LUMO+6 (35.19%). |
|         |     | 4.4927 | 275.97 | 0.1154 | HOMO-5 → LUMO (30.85%).<br>HOMO-4 → LUMO (36.80%).<br>HOMO → LUMO+6 (19.33%).                              |
| Triplet | Gas | 1.9708 | 629.12 | 0      | HOMO-1 → LUMO (40.22%).<br>HOMO → LUMO (55.16%).                                                           |
|         | DCM | 1.9783 | 626.72 | 0      | HOMO-1 → LUMO (40.85%).<br>HOMO → LUMO (55.12%).                                                           |

SI7. Atoms coordinates of ImPy-1, ImPy-2 and ImPy-3.

#### ImPy-1

6 1.9030290 1.3192920 0.0378780

|   |            |            |            |
|---|------------|------------|------------|
| 6 | 2.6430130  | 2.5226130  | -0.0472520 |
| 6 | 2.0065750  | 3.7294340  | 0.0439190  |
| 6 | 0.5943490  | 3.7731090  | 0.2462730  |
| 6 | -0.1345700 | 2.6281650  | 0.2850830  |
| 6 | 0.0112960  | 0.1106910  | 0.1288250  |
| 6 | 2.1831520  | -0.0532280 | 0.0167750  |
| 1 | 3.7129160  | 2.4651080  | -0.1926880 |
| 1 | 2.5675670  | 4.6526560  | -0.0272300 |
| 1 | 0.0851210  | 4.7197280  | 0.3714070  |
| 1 | -1.1999870 | 2.6020060  | 0.4497420  |
| 7 | 1.0162020  | -0.7501700 | 0.0687630  |
| 7 | 0.4959890  | 1.4070260  | 0.1311320  |
| 6 | 3.4752870  | -0.7423090 | -0.0842300 |
| 6 | 4.6690530  | -0.1774690 | 0.3909760  |
| 6 | 3.5274320  | -2.0248250 | -0.6540240 |
| 6 | 5.8767710  | -0.8601290 | 0.2744070  |
| 1 | 4.6517370  | 0.7837500  | 0.8900080  |
| 6 | 4.7336360  | -2.7057150 | -0.7639020 |
| 1 | 2.6061230  | -2.4719570 | -1.0053680 |
| 6 | 5.9167130  | -2.1251090 | -0.3069990 |
| 1 | 6.7865540  | -0.4071810 | 0.6530890  |
| 1 | 4.7521980  | -3.6937700 | -1.2107840 |
| 1 | 6.8574130  | -2.6567650 | -0.3952380 |
| 6 | -1.3959020 | -0.2897770 | 0.1981170  |
| 6 | -2.4297510 | 0.4314290  | -0.3726220 |
| 6 | -1.6963600 | -1.5259810 | 0.8432980  |
| 6 | -3.7732720 | -0.0157830 | -0.3013770 |
| 1 | -2.2297300 | 1.3377610  | -0.9320310 |
| 6 | -2.9839660 | -1.9816590 | 0.9251590  |
| 1 | -0.8757520 | -2.0942720 | 1.2613740  |
| 6 | -4.8427780 | 0.7139770  | -0.8842130 |
| 6 | -4.0635110 | -1.2457300 | 0.3670420  |
| 1 | -3.1952490 | -2.9214600 | 1.4247300  |
| 6 | -6.1353650 | 0.2558000  | -0.8011400 |
| 1 | -4.6233170 | 1.6436550  | -1.3993330 |
| 6 | -5.4076350 | -1.6890860 | 0.4376790  |
| 6 | -6.4218910 | -0.9564080 | -0.1317890 |
| 1 | -6.9426530 | 0.8233680  | -1.2501820 |
| 1 | -5.6239860 | -2.6217150 | 0.9483090  |
| 1 | -7.4461160 | -1.3067120 | -0.0723700 |

### ImPy-2

|   |           |           |            |
|---|-----------|-----------|------------|
| 6 | 2.6886610 | 1.2879040 | -0.0911460 |
| 6 | 3.4884230 | 2.4516650 | -0.1848730 |

|   |            |            |            |
|---|------------|------------|------------|
| 6 | 2.9072360  | 3.6733990  | -0.3830760 |
| 6 | 1.4900880  | 3.7715170  | -0.5202770 |
| 6 | 0.7092530  | 2.6633340  | -0.4435320 |
| 6 | 0.7489330  | 0.1545750  | -0.1622110 |
| 6 | 2.9080430  | -0.0908670 | 0.0232850  |
| 1 | 4.5629440  | 2.3496500  | -0.1236660 |
| 1 | 3.5169710  | 4.5646790  | -0.4605810 |
| 1 | 1.0203520  | 4.7280260  | -0.7087760 |
| 1 | -0.3595230 | 2.6738880  | -0.5859870 |
| 7 | 1.7155320  | -0.7433500 | -0.0461660 |
| 7 | 1.2873560  | 1.4292690  | -0.2091540 |
| 6 | 4.1699760  | -0.8245750 | 0.1753250  |
| 6 | 5.3012850  | -0.2577050 | 0.7828960  |
| 6 | 4.2554740  | -2.1508110 | -0.2786350 |
| 6 | 6.4842400  | -0.9813270 | 0.9044120  |
| 1 | 5.2485320  | 0.7407080  | 1.1995780  |
| 6 | 5.4360630  | -2.8722120 | -0.1514770 |
| 1 | 3.3794770  | -2.6010020 | -0.7280650 |
| 6 | 6.5603230  | -2.2899750 | 0.4338810  |
| 1 | 7.3443620  | -0.5248490 | 1.3820720  |
| 1 | 5.4808220  | -3.8940320 | -0.5124090 |
| 1 | 7.4814670  | -2.8534390 | 0.5306140  |
| 6 | -0.6748860 | -0.1827030 | -0.2253060 |
| 6 | -1.6750110 | 0.6006530  | 0.3201590  |
| 6 | -1.0357920 | -1.4216180 | -0.8368620 |
| 6 | -3.0379520 | 0.2155750  | 0.2531220  |
| 1 | -1.4345110 | 1.5118090  | 0.8557470  |
| 6 | -2.3414980 | -1.8190480 | -0.9149750 |
| 1 | -0.2431400 | -2.0420490 | -1.2344870 |
| 6 | -4.0752810 | 1.0032280  | 0.8064100  |
| 6 | -3.3905250 | -1.0167450 | -0.3831200 |
| 1 | -2.5942760 | -2.7617510 | -1.3886150 |
| 6 | -5.3927850 | 0.6131160  | 0.7335140  |
| 1 | -3.8213350 | 1.9361180  | 1.2992230  |
| 6 | -4.7452910 | -1.3986330 | -0.4515820 |
| 6 | -5.7358780 | -0.6039300 | 0.0936200  |
| 1 | -6.1585470 | 1.2414000  | 1.1679070  |
| 1 | -5.0295660 | -2.3279880 | -0.9311990 |
| 8 | -7.0147260 | -1.0636390 | -0.0247500 |
| 6 | -8.0756690 | -0.3024530 | 0.5349920  |
| 1 | -8.1500580 | 0.6889760  | 0.0743870  |
| 1 | -8.9844360 | -0.8631430 | 0.3224600  |
| 1 | -7.9665270 | -0.1935120 | 1.6197810  |

**ImPy-3**

|   |            |            |            |
|---|------------|------------|------------|
| 6 | -5.2538660 | -2.9241600 | -1.3170070 |
| 6 | -3.8909270 | -2.7977180 | -1.5751160 |
| 6 | -3.1536070 | -1.7305710 | -1.0362250 |
| 6 | -3.8158060 | -0.7700700 | -0.2145180 |
| 6 | -5.2148810 | -0.9081730 | 0.0436250  |
| 6 | -5.9107700 | -1.9909820 | -0.5172560 |
| 6 | -1.7506150 | -1.5633740 | -1.2826820 |
| 6 | -3.0842110 | 0.3236970  | 0.3434000  |
| 6 | -1.6828300 | 0.4606960  | 0.0824890  |
| 6 | -1.0488020 | -0.5235400 | -0.7534130 |
| 6 | -0.9838230 | 1.5667030  | 0.6394240  |
| 6 | -1.6819740 | 2.4815300  | 1.4470900  |
| 6 | -3.0395880 | 2.3473620  | 1.7007570  |
| 6 | -3.7675980 | 1.2785220  | 1.1578340  |
| 6 | -5.1727370 | 1.1138660  | 1.4020420  |
| 6 | -5.8649660 | 0.0696540  | 0.8707470  |
| 1 | -6.9284290 | -0.0421060 | 1.0646170  |
| 1 | -5.6752720 | 1.8477410  | 2.0264500  |
| 1 | -1.2467390 | -2.2940790 | -1.9098740 |
| 1 | -5.8086350 | -3.7554170 | -1.7421170 |
| 1 | -3.3830690 | -3.5277520 | -2.1995170 |
| 1 | -6.9743700 | -2.0940790 | -0.3198180 |
| 1 | 0.0143050  | -0.4346250 | -0.9357150 |
| 1 | -1.1369240 | 3.2968320  | 1.9128500  |
| 1 | -3.5455230 | 3.0665270  | 2.3390190  |
| 6 | 2.4168820  | 2.8008300  | 0.0220130  |
| 7 | 1.4064960  | 0.8466680  | 0.5326200  |
| 7 | 1.0198160  | 2.9921720  | 0.0937030  |
| 6 | 2.6124080  | 1.4377240  | 0.2888600  |
| 6 | 3.8612020  | 0.6685570  | 0.3573390  |
| 6 | 3.9123520  | -0.4944250 | 1.1473040  |
| 6 | 5.0135140  | 1.0394170  | -0.3578410 |
| 6 | 5.0813810  | -1.2447430 | 1.2342500  |
| 1 | 3.0204780  | -0.7930500 | 1.6873940  |
| 6 | 6.1849530  | 0.2893220  | -0.2626880 |
| 1 | 4.9851380  | 1.8955640  | -1.0237800 |
| 6 | 6.2270630  | -0.8536150 | 0.5364860  |
| 1 | 5.1006170  | -2.1374570 | 1.8531960  |
| 1 | 7.0625410  | 0.5921330  | -0.8270470 |
| 1 | 7.1394420  | -1.4383050 | 0.6085130  |
| 6 | 2.6587010  | 5.1512640  | -0.4858950 |
| 1 | 3.2785920  | 6.0197120  | -0.6799390 |
| 6 | 1.2350710  | 5.2798910  | -0.4960230 |
| 1 | 0.7681310  | 6.2294800  | -0.7310620 |

|   |            |           |            |
|---|------------|-----------|------------|
| 6 | 3.2315710  | 3.9317810 | -0.2374190 |
| 1 | 4.3077140  | 3.8104130 | -0.2248190 |
| 6 | 0.4571490  | 1.7670390 | 0.4194880  |
| 6 | 0.4423360  | 4.2119950 | -0.2084570 |
| 1 | -0.6382090 | 4.2431010 | -0.2012800 |

**Table ST 9.** Summary of performance of reported purely organic small molecules unipolar blue OLEDs so far voltage (OV), power efficiency (PE), current efficiency (CE), external quantum efficiency (EQE), and CIE coordinates of the devices.

| Emitters                                                                            | Voltage [V] | PE <sub>max</sub> lm W <sup>-1</sup> | CE <sub>max</sub> cd A <sup>-1</sup> | EQE <sub>max</sub> (%) | CIE (x, y)   | Ref.         |
|-------------------------------------------------------------------------------------|-------------|--------------------------------------|--------------------------------------|------------------------|--------------|--------------|
| 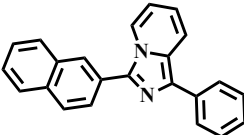   | 7.5         | 0.8                                  | 2.5                                  | 1.2                    | (0.19, 0.24) | This work    |
|   | 6.2         | 1.9                                  | 3.7                                  | 1.6                    | (0.21, 0.32) | This work    |
|  | 5.6         | 4.7                                  | 8.4                                  | 4.3                    | (0.19, 0.36) | This work    |
|  | 2.76        | 3.03                                 | 4.36                                 | 3.52                   | 0.156, 0.155 | <sup>2</sup> |
|  | 3.74        | 1.01                                 | 2.41                                 | 1.56                   | 0.166, 0.213 | <sup>3</sup> |
|  | 3.32        | 1.51                                 | 3.24                                 | 2.71                   | 0.154, 0.147 |              |

|                                                                                     |      |      |       |      |              |              |
|-------------------------------------------------------------------------------------|------|------|-------|------|--------------|--------------|
| 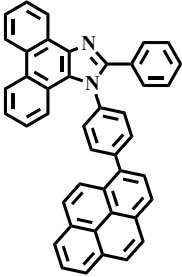   | 3.59 | 1.76 | 3.64  | 2.82 | 0.153, 0.163 |              |
|    | 3.8  | -    | 0.513 | 2.43 | 0.160, 0.034 | <sup>4</sup> |
|    | 2.9  | -    | 2.62  | 3.68 | 0.157, 0.084 |              |
|   | 2.6  | 0.71 | 1.15  | 0.83 | 0.16, 0.17   | <sup>5</sup> |
|  | 2.5  | 0.49 | 0.90  | 0.85 | 0.15, 0.12   |              |
|  | 3.2  | -    | 5.88  | 5.11 | 0.15, 0.14   | <sup>6</sup> |
|  | 3.5  | -    | 3.43  | 2.29 | 0.16, 0.18   |              |
|  | 2.8  | 0.78 | 0.89  | 0.95 | 0.15, 0.11   | <sup>7</sup> |



|                                                                                   |     |      |      |      |            |
|-----------------------------------------------------------------------------------|-----|------|------|------|------------|
| 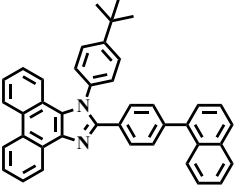 | 3.2 | 0.55 | 0.53 | 0.60 | 0.14, 0.10 |
|  | 3.0 | 1.44 | 1.37 | 1.61 | 0.14, 0.11 |
|  | 3.4 | 1.07 | 1.2  | 1.47 | 0.15, 0.11 |
|  | 2.5 | 3.17 | 3.27 | 2.07 | 0.15, 0.18 |

## References

- 1 M. J. Frisch et.al, *Gaussian 09, Revision D.01, Gaussian, Inc., Wallingford CT*, 2009.
- 2 S. Zhuang, R. Shangguan, J. Jin, G. Tu, L. Wang, J. Chen, D. Ma and X. Zhu, *Org. Electron.*, 2012, **13**, 3050–3059.
- 3 S. Zhuang, R. Shangguan, H. Huang, G. Tu, L. Wang and X. Zhu, *Dye. Pigment.*, 2014, **101**, 93–102.
- 4 T. Shan, Y. Liu, X. Tang, Q. Bai, Y. Gao, Z. Gao, J. Li, J. Deng, B. Yang, P. Lu and Y. Ma, *ACS Appl. Mater. Interfaces*, 2016, **8**, 28771–28779.
- 5 F. Zhang, W. Li, D. Wei, X. Wei, Z. Li, S. Zhang, S. Li, B. Wei, G. Cao and B. Zhai, *RSC Adv.*, 2016, **6**, 60264–60270.
- 6 T. Shan, Z. Gao, X. Tang, X. He, Y. Gao, J. Li, X. Sun, Y. Liu, H. Liu, B. Yang, P. Lu and Y. Ma, *Dye. Pigment.*, 2017, **142**, 189–197.
- 7 Y. Zhang, J.-H. Wang, G. Han, F. Lu and Q.-X. Tong, *RSC Adv.*, 2016, **6**, 70800–70809.
